# Supplementary material for: Circulating miR-146a predicts glucocorticoid response in thyroid eye disease
Source: PubMed Central journal article supplement (PMC10563606; doi:10.1530/etj-23-0083), 2023-09-22

miR-146a expression levels

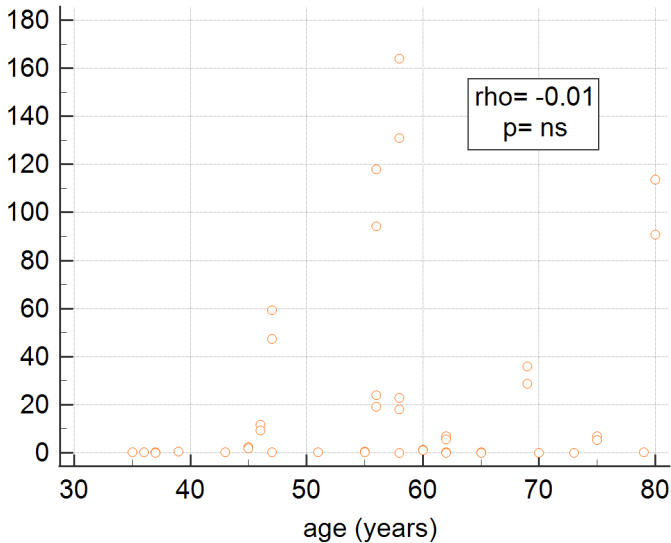

Supplement: supplementary_figure_3.pdf [file supplementary_figure_3.pdf]
